# Supplementary material for: Isovolumetric replacement and aeolian deposition contributed to Terraecalcis genesis in Franconia (central Germany)
Source: Copernicus journal article supplement (doi:10.5194/soil-2017-4), 2017-02-01
Supplement: Supplementary file [file soil-2017-4-RC2-supplement.pdf]

One of the major problems with this manuscript is that it concerns a topic which has already been extensively studied by many soil scientists. Approaches to be used in this kind of studies on residual materials and analytical methods are well established. Crucial questions include:

- can the composition (both chemical and mineralogical) of the non-carbonate components of the 'residual' material be linked to the non-carbonate fraction of the limestone;
- if a residual origin must be assumed, how much limestone should have been dissolved and what implications does this have for the geomorphological development of the area.
- What may be the origin of the materials that do not originate from the original limestone, and that goes far beyond the ubiquitous loess cover, but today includes such materials as volcanic (micro)tephra, Sahalian dust, etc.
- To what extent are materials encountered the result of inheritance of early depositional characteristics or diagenetic processes (e.g. chert formation) or the result of much more recent subaerial weathering.
- In case of assumed recent neoformation: can the flux required for the production of the presumed neoformed materials (stocks) be accounted for/ be explained. This requires a good understanding of the geochemistry of the system and fluxes of solutes that are possible under the specific conditions.

Crucial techniques include:

- Full chemical and mineralogical analyses of the soil material and the limestone and its residue, including a proper identification of the clay fraction. The latter has to include XR-diffraction data and not only EDS or other chemical analytical techniques.
- A proper description of the micromorphology of the material to have a good understanding of its fabric and provenance of components (e.g. clay, nodules, concretions, etc.).
- Eventually isotopic analyses to identify the origin of the various minerals encountered (e.g. Sr and Nd isotopes to establish the origin of tephra).
- If current soil formation and weathering are to be included in the research: information on the chemical composition of the soil solution and its link to geochemical processes.

The current manuscript basically consists of "static" chemical data at the nanometer scale (EDS) providing only information on element distribution in the soil matrix, and some general data on the distribution and habitus of Fe species (apart from standard very general soil data). That is all.

- there is no information on the chemical/mineralogical composition of the non-carbonate components in the residual soil nor in the limestone
- there is no full study of the potential provenance of the non-carbonate fraction
- there is no information on the presence of original or diagenetic features in the limestone (for example the presence of clay in fossils, which may well be of very early age and the presence of silica)
- there is no understanding at all of the geochemistry of these systems and behavior of the various species in this system.

As to techniques:

- no full chemical and mineralogical analyses, particularly no XR-diffraction data
- no full study of the potential provenance of the non-carbonate fraction.
- no micromorphology
- no isotopic analyses nor full study of trace elements to study the potential provenance of the various materials/components. Typical example is the Zr/Ti ratio which clearly indicates that the residual fill has very little to do with a dissolution residue from the limestone.
- no understanding of the geochemistry of these systems, e.g. the assumption that  $Al^{3+}$  plays a role in these systems and occurs as a solute, leading to isovolumetric substitution. Study of current composition of the soil solution and speciation of the solutes would easily have shown that.

Moreover, all kinds of terms are being used in connection with the apparently major phenomena: occurrence of clay size material in small voids:

Isovolumetric replacement, pressure-driven metasomatic replacement, authigenic clay neoformation, exchange process characterized by substitution, pressure-driven isovolumetric replacement during authigenic clay neoformation, replacement processes, metasomatic processes.

There are very fundamental differences between the various processes basically coming to: a) precipitation from the solution and b) mass transport as suspended material in the solution. 'Replacement processes' is a meaningless term in this context. This holds the more, while 'replacement' cannot be observed as an active process, but is merely an interpretation of spatial structures and distribution of elements. What is dearly needed is a clear definition of the various terms and their strict application + arguments that exist for one or another interpretation. Now it is a mess and often completely obscure what is truly meant.

All in all, I am not very happy about this study, which in fact has only a few EDS results as 'new data' and rambles on from one assumption to another, and from quite poorly founded conclusions to bland nonsense. Moreover, the very extensive literature review is incomplete, missing major and highly relevant studies, highly unbalanced (a lot of completely irrelevant studies), and poorly structured, mixing results with assumptions and conclusions, and not to the point.

Typical example of the quality is the text in the lines 737-741: Extremely vague: can contribute – not yet possible – cannot yet be fully explained – further studies - should consider the possible role. In other words, one asks oneself what the contribution of this paper is if these are the conclusions. Not a very impressive contribution to science and that is also my general conclusion: *not a significant contribution to science at all. Just a few observations with EDS on some thin sections from residual limestone soils. Much too far reaching interpretations and too many unsubstantiated claims based on these limited data.*

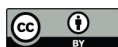

1    **Isovolumetric replacement and aeolian deposition contributed to Terrae calcis**  
2    **genesis in Franconia (central Germany)**

3    Bernhard Lucke<sup>1</sup>, Helga Kemnitz<sup>2</sup>, Stephan Vitzethum<sup>1</sup>

4    <sup>1</sup>Institute of Geography, Friedrich-Alexander University Erlangen-Nürnberg,  
5    Wetterkreuz 15, 91058 Erlangen, Germany

6    <sup>2</sup> Helga Kemnitz, Katharinenholzstr. 33 B, 14469 Potsdam, Germany

7    Correspondence to: [bernhard.lucke@fau.de](mailto:bernhard.lucke@fau.de)

8

9    Keywords: Isovolumetric replacement, metasomatism, amorphous clay, illuviation,  
10    authigenic clay neoformation, bedrock residue, soils on limestone, Terrae calcis,  
11    Terra rossa, Terra fusca

12

13

14

15

16

17

18

19

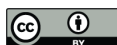

20

## 21 **Abstract**

22 We investigated Terrae calcis on limestone and dolomite in Franconia, as well as the  
23 red fill of deep cracks in the rock (*Karstschlotten*). SEM images of the rock-soil  
24 transition zones supported by EDS found amorphous clays along fissures that could  
25 be products of metasomatic, authigenic clay neoformation within microfossils, calcite,  
26 and dolomite grains, or of replacing deposition of amorphous clays inside the calcite,  
27 probably due to percolating waters (illuviation). In the SEM-images, the replacement  
28 appears as exchange process characterized by substitution of Ca and Mg against Si,  
29 Al, and Fe. There is no crystalline clay deposited within rock fissures, and the  
30 transition between calcareous minerals and amorphous clay is gradual. This and the  
31 presence of Fe let it seem possible that plant roots play a major role for the transport  
32 of elements and neoformation of clays, similar to clay pavements along eucalyptus  
33 roots in Western Australia. In this context, more or less uniform Fe(d/t) ratios  
34 contradicting other weathering indicators could be the result of neoformed  
35 phyllosilicates containing Fe<sup>3+</sup>. Bulk soil and bedrock analyses indicate that the solum  
36 of the investigated Terrae calcis does mainly not represent insoluble bedrock residue.  
37 Dust deposition and bioturbation are evident due to sand grains coming from a loess  
38 surface cover, which buried pre-existing Terrae calcis and contributed to their  
39 substrate, apparently supplying quartz and clay-rich pseudosand aggregates.

40

## 41 **1. Introduction**



42 Until today, there is no general agreement on the genesis of clay-rich red or brown  
43 soils on hard limestone in Mediterranean and temperate climates. It has even been  
44 suggested that they do not represent true soils but a type of claystone (Merino and  
45 Banerjee, 2008). The soil science community largely follows Kubiěna's (1945) model,  
46 which proposes that they represent true soils characterized by accumulation of clay.  
47 He termed mature profiles 'Terra fusca' (with brown color) and 'Terra rossa' (with red  
48 color). Despite the color difference, these soils are characterized by very similar  
49 properties. Their close relationship is expressed by the summarizing group name  
50 'Terra calcis' (Kubiěna, 1945), which has been adopted in the German soil  
51 classification guidelines (Ad-hoc AG Boden, 2005). Most other soil classification  
52 systems do not use such specific terms for clay-rich soils on limestone, but they are  
53 applied here as we consider them useful for referring to previous works and  
54 discussing the problems connected with the investigation of these soils. For an  
55 extensive summary of the literature and a discussion of classification issues, in  
56 particular the relation to similar soils in the tropics, see Skowronek (2016).  
57 limited part of the literature on the subject can be summarized here; for more  
58 comprehensive information see also the reviews in Merino and Banerjee (2008),  
59 Trappe (2011), Fedoroff and Courty (2013), and Lucke et al. (2012, 2014).

60

## 61 1.1 Parent materials

62 The debate on the genesis of Terra calcis starts with the parent material. Leiningen  
63 (1930) and Kubiěna (1945) suggested that they resemble mainly the non-soluble  
64 residue of calcareous rocks after in-situ dissolution of limestone by meteoric water.  
65 However, already these authors contemplated that Terra calcis may contain a major

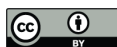

66 allochthonous component, possibly mainly from aeolian dust. As outlined by Schmidt  
67 et al. (2006), it seems well possible that the contributions of sources vary locally.  
68 Studies in Italy (Moresi and Mongelli 1988), China (Shijie et al. 1999; Ji et al. 2004a,  
69 2004b), and Turkey (Temur et al. 2009) support the residual theory since the mineral  
70 assemblies and geochemistry of these soils are largely similar to the non-calcareous  
71 residue of the underlying limestones. However, at other locations substantial  
72 differences between soil and rock residue have been found (e.g. Leiningen 1915;  
73 Durn et al. 1999). As well, it seems questionable at some locations whether residual  
74 formation out of pure limestone could be possible, as this would require the  
75 dissolution of huge amounts of rock (Yaalon and Ganor 1973; Merino and Banerjee  
76 2008). In this context, long-range transport of Saharan dust was found to play a  
77 significant role for soil formation on limestone in a large part of the northern  
78 hemisphere (e.g. Muhs, 2001; Muhs et al., 2007; Lucke et al., 2014).

79

## 80 **1.2 Mechanisms of soil formation: aeolian deposition, bedrock dissolution, and** 81 **illuviation**

82 Closely connected with the question of parent materials is the mechanism of soil  
83 formation. Since a steady deposition of Saharan dust takes place in the  
84 Mediterranean (Martin et al. 1989), Yaalon and Ganor (1973) suggested that clay-  
85 and Fe-rich dust settling with precipitation is the main substrate of most *Terrae calcis*  
86 in that area. Saharan dust could even be traced in *Terrae calcis* of the West Indies  
87 (Muhs 2001; Muhs et al. 2007; Prognon et al. 2011). Danin et al. (1982) found fossil  
88 marks of lichen on limestone under a *Terra rossa* in Israel, suggesting that ~~that~~ the  
89 rock had once been exposed to sunlight before being covered by soil. In northern



90 Jordan, Lucke et al. (2014) found a continuous dust signal in soils on different  
91 bedrocks and concluded that aeolian deposition must have provided a significant  
92 amount of the soil parent material, even though a specific and significant contribution  
93 of each different bedrock was clearly indicated as well. Therefore it seems possible  
94 that a mixture of aeolian deposition and bedrock weathering can contribute to the  
95 genesis of *Terrae calcis*.

96

97 Dissolution of limestone, in particular of clay-rich marls that are often interbedded in  
98 calcareous formations, could directly produce a clayey residue (Bronger et al., 1984).  
99 During assumed long periods of soil formation, such clay-rich interlayers d have  
100 disappeared due to weathering, which is why a divergent composition of the soil and  
101 the now underlying limestone does not necessarily prove an allochthonous origin of  
102 the solum. In this context, Frolking et al. (1983) and Fedoroff and Courty (2013, and  
103 references therein) suggested an illuvial origin of the phyllosilicates ce smectites  
104 may maintain surface acidity even when dispersed in Ca-rich water (Mortland and  
105 Raman, 1968), clays might be transported by subsurface waters, trigger limestone  
106 dissolution, and accumulate, leading to an effective replacement of limestone by clay.  
107 As chert bands in the Galena dolomite in Wisconsin continued through the clays  
108 studied by Frolking et al. (1983), this replacement must have taken place  
109 isovolumetrically, i.e. not creating larger voids so the chert bands were not disturbed.  
110 That the clays had been transported was indicated by oriented coatings on slightly  
111 weathered dolomite in greater amounts than could result from in-situ rock dissolution  
112 (Frolking et al., 1983). 

113



### 114    **1.3 Metasomatism in Terrae calcis genesis**

115    An alternative way of Terrae calcis genesis was first suggested by Blanck (1915): the  
116    clay-rich substrate could not only be product of bedrock weathering, illuviation, or  
117    aeolian deposition, but consist of newly formed (authigenic) clay minerals that  
118    replaced the limestone in a pressure-driven metasomatic reaction. In this context,  
119    Stephenson (1939) and Ross and Stephenson (1939) discovered fossil mollusks that  
120    had apparently been replaced by beidellite and were preserved as clay structures in  
121    a limestone bed near Pontotoc, Mississippi. Monroe (1986) reviewed literature  
122    regarding the replacement of limestones by clay and conducted a replacement  
123    experiment based on circulation of mineralized groundwater through limestone: the  
124    experiment failed, but the reported evidence suggested that limestone could indeed  
125    be replaced by lime-free clay. These examples, however, do not only refer to the  
126    genesis of soils on limestone, but to clay layers within limestone beds and to clay fills  
127    of subterranean caves (see also Zippe, 1854; Weyl, 1959; and Fenelon, 1976). 

128

129    Maliva and Siever (1988) simulated in the laboratory how chemically completely  
130    strange guest minerals can grow in host minerals if a superconcentration of ions  
131    precipitating as guest mineral is present: the guest mineral replaces the host mineral  
132    in a pressure-driven reaction while maintaining its bedding structures (by 'force of  
133    crystallization'). In this context, Zhu and Li (2002) described metasomatic relic  
134    bedding structures of the underlying limestone in Terra Rossa in southern China,  
135    which could be result of replacement processes as simulated by Maliva and Siever  
136    (1988).  Ino and Banerjee (2008) investigated thin sections of a 'bleached zone' in  
137    the rock-soil transition zone of a Terra rossa in Bloomington, Indiana, and described a





138 'reaction front' that was characterized by partial isovolumetric replacement of  
139 limestone by clay, as well as dissolution voids that were associated with the  
140 replacement. They calculated a thermodynamic model of the replacement reaction.  
141 According to this model, the reaction would on the one hand lead to a pressure-  
142 driven isovolumetric replacement of the limestone during authigenic clay  
143 neoformation, meaning that the mass balance of soil formation versus bedrock  
144 dissolution requires much less limestone for soil formation than the residue model.  
145 On the other hand, the reaction would produce acids which could explain the  
146 association of Terraie rossa with karst, and lead to additional chemical dissolution of  
147 limestone with a subsequent mixing of the non-soluble residue with the newly formed  
148 clay.

149

150 However, even the comprehensive model presented by Merino and Banerjee (2008)  
151 cannot fully explain (authigenic) clay neoformation: one major question is the supply  
152 of ions into the rock fissures. Merino and Banerjee (2008) suggested that dissolved  
153 aerosols would deliver the necessary elements (mainly Si, Al, and Fe). Banerjee and  
154 Merino (2011) further refined the replacement model by accounting for diffusion and  
155 infiltration processes. These were based on Amran and Ganor's (2005) dissolution  
156 half-lives of smectites in water – for pH 5. However, considering the often neutral to  
157 slightly alkaline pH-values as e.g. found by Lucke et al. (2012) for most Terraie calcis  
158 in northern Jordan, it seems still questionable how ions of Al that are hardly soluble  
159 under such conditions could be mobilized from the surface into the rock pores.  
160 Metasomatic features could be relic and have formed when soils were completely  
161 decalcified, which seems possible since there is evidence that Terraie calcis in Jordan



162 were subject to re-calcification in the recent past (Lucke, 2008). However, organic  
163 matter might play a role too: Blanck (1915, 1926), Blanck et al. (1928) and Blanck  
164 and Oldershausen (1936) proposed that organic acids provide colloids that prevent  
165 ions from precipitating even when in contact with calcareous rocks (see also the  
166 comprehensive review in Blanck (1930).  idea could explain why red soils are  
167 largely absent on calcareous rocks of temperate zones: due to the much lower  
168 humus contents of soils in Mediterranean climates, ions must precipitate when  
169 reaching the calcareous rocks, but not if larger humus concentrations are present  
170 (Blanck, 1915). It could mean that Terra fusca might be less a product of replacement  
171 processes than Terra rossa due to the usually significantly higher contents of organic  
172 matter in Terra fusca.

173 

174 However, other ion transport mechanisms seem possible too: Reifenberg (1927,  
175 1947) argued that silicic acids, and not humus, provided the colloid that prevented  
176 flocculation of sesquioxides and growth of minerals before ions entered the rock  
177 pores. Reifenberg (1947) suggested further that the source of the ions in semi-arid  
178 areas might not be the soil surface, but ascending waters from the rocks. Lucke et al.  
179 (2012) suggested that plant roots might supply the necessary ions to the rock pores,  
180 based on the observation that plant roots can often be found in rock fissures, and on  
181 the reported neoformation of clays associated with root exudates of mallee eucalypts  
182 in geochemically completely different sand dunes that was observed by Verboom et  
183 al. (2009). This casts some doubts on a possible connection of organic matter and  
184 colors of Terrae calcis, although Terefe et al. (2008) suggested that repeated  
185 vegetation fires and thus organic matter could cause long-term red coloration.



186

#### 187 **1.4 Colors of Terrae calcis**

188 Various ideas have been brought forward to explain the prevalence of brown and red  
189 colors of Terrae calcis. The red color of Terrae rossae could be inherited from the  
190 insoluble limestone residue (Bronger et al., 1984), could have formed during  
191 pedogenesis under warmer and more humid climates of the past (Klinge, 1958), or  
192 simply result from oxidized  $\text{Fe}^{2+}$  that was released during the weathering of  
193 carbonate rocks (Meyer, 1979). Schwertmann et al. (1982) suggested that rapid  
194 wetting-drying cycles as often prevailing in Mediterranean climates and on well-  
195 drained karst areas can lead to recrystallization of ferrihydrite as hematite, which  
196 gives red color even when present in only small concentrations. Although this  
197 process could not yet be modeled in the laboratory, Barrón and Torrent (2002)  
198 showed that ferrihydrite can transform into maghemite under presence of phosphate  
199 or other ligands capable of exchange of Fe-OH surface groups. Based on this,  
200 Torrent et al. (2006) suggested that maghemite formation is a precursor of hematite  
201 during ferrihydrite transformation in aerobic soils poor in organic matter, which  
202 matches evidence collected by Lucke and Sprafke (2015) along a climatic transect in  
203 northern Jordan. In contrast, the prevailing brown colors of temperate areas seem  
204 connected to less pronounced moisture differences, and it has been suggested that a  
205 change to moister and cooler conditions could have caused xanthization of formerly  
206 red soils, meaning that red-colored hematite would change to goethite (Boero and  
207 Schwertmann, 1987) [↓](#)

208



## 209 **2. Genesis of Terra calcis in Franconia (central Germany)**

210 Franconia hosts widespread limestone plateaus which are partially covered by  
 211 brownish and reddish Terra calcis (locally called *Ablehm*). These plateaus were  
 212 mostly not glaciated, but situated in a periglacial environment during the Pleistocene.  
 213 Terraes calcis are partly present at the surface, and partly buried by loess and sands,  
 214 and can be found as fills of deep cracks and dolines in the limestones. While the  
 215 plateau soils are mostly brown, the crack fills are often characterized by intense red  
 216 colors. Their environmental significance is debated. According to Mückenhausen et  
 217 al. (1975), red infillings in limestone cracks could be relics of a former soil cover,  
 218 possibly of *Terrae rossae* or *Ferralsols* from the Cretaceous or Tertiary, which was  
 219 eroded on the surface but preserved in the cracks. Zech et al. (1979) investigated red  
 220 clayey fills in karst cracks of Franconia and concluded that their color testifies to  
 221 formation during warmer and moister tropical climates of the past. This is supported  
 222 by higher amounts of kaolinite in the clay infillings compared to the residue of the  
 223 surrounding bedrock. However, in the light of theories of *Terrae calcis* formation  
 224 discussed above, it seems also possible that the crack fills are products of illuviation,  
 225 or clay neoformation – and the different color might be explained by divergent organic  
 226 matter contents, since the cracks are not connected to the actual surface.

227

228 In this context, “powdery” layers of  $\text{CaCO}_3$  of approximately 1 mm thickness have  
 229 been described by Trappe (2011: 96) for the rock-soil transition zones of *Terrae calcis*  
 230 in our studied area in Franconia, who interpreted them as potential evidence of  
 231 insoluble limestone residue contributing to solum formation. However, the limestones  
 232 are very pure: Häusler and Niederbudde (1992) estimated that about 3 mm of soil



cover could have formed out of the respective limestone residue during the Holocene, meaning that Terrae calcis such as the ones investigated in this study would have experienced about 2.7 Ma of soil development under the current climate without erosion in order to reach the present depth. Trappe (2011) argued in this context that the Terrae calcis and crack fillings in Franconia represent mixed sediments, largely stemming from weathered chalk layers, since the limestones produce too little residue. However, no high-resolution study of the micromorphology of these soils and their transition zones to bedrock was yet accomplished.

241

Although a final explanation of the mechanisms of the metasomatic replacement process  not yet be offered, there is growing evidence that in-situ neoformation of clay can contribute to the formation of clay-rich soils on limestone (see e.g. Feng et al. (2009) and the review by Lavery (2012). Key evidence for isovolumetric replacement are 'shadows' of the original rock structures that are preserved in the soil-rock transition zone, in particular microfossils partially consisting of clay. If neoformation of clay minerals in limestone took or takes place, a spatially precise approach focusing on partially replaced microfossils can track it. And if partially replaced microfossils can be confirmed for Terrae fuscae, it would suggest that metasomatic processes are less dependent on organic matter than suggested by Blanck (1915).  Therefore we studied the micromorphology of the rock-soil transition zones of two Terrae fuscae and a limestone crack filled with Terra rossa in Franconia with regard to the presence of partially replaced microfossils and minerals. In addition, bulk samples of the substrate and the microsurfaces of sand grains were investigated. These areas had been studied before by Blanck and Oldershausen



257 (1936), and we attempted to re-visit some of their investigation sites in order to honor  
258 their prior efforts, applying now available more advanced methods of analysis.

259

### 260 **3. The sampled profiles**

261 From a total of five studied sites, two are presented here. The first profile 'Fricke' is  
262 located in a quarry approximately 4 km southeast of the town Weißenburg i. Bayern  
263 on top of a limestone plateau (N 49° 00' 36.6", E 11° 01' 35.7", see figs. 1, 2a and b).  
264 Here a thick hard limestone from the upper Jurassic/Malm  $\delta$  containing *Ammonites*  
265 *pseudomutabilis* (locally called *Weißenburger Marmor*) is exposed, which is well-  
266 suited for construction and exported worldwide. The rock has vertical cracks that are  
267 filled with uniform red clay which was already observed and studied by Blanck and  
268 Oldershausen (1936). We named our profile according to the designation given by  
269 these authors, although the exact part of the limestone quarry which they studied has  
270 been removed by constant quarrying during the past 80 years. In the studied profile,  
271 the clay-filled cracks are not connected to the present surface, but interrupted by  
272 another layer of hard limestone. On this layer a zone of intense rock weathering (see  
273 fig. 2b) resembles the bedrock of soil formation on the current surface. It can  
274 however not be excluded that there was a connection of the crack to the surface in  
275 the front of the profile that was removed by quarrying.

276

277 The soil developed at the surface can be classified as Cambisol (Siltic) according to  
278 the World Reference Base of Soil Resources (WRB 2014). According to the German  
279 soil classification system (Ad-hoc AG Boden 2005), a Braunerde-Terra fusca is  
280 present: the lower part of the profile could be described as Terra fusca, which



281 gradually changes into a Braunerde formed out of loess in the upper part. Soil  
282 horizons were classified according to the German system (Ad-hoc AG Boden 2005,  
283 see figs. 2a and b). There is a gradual transition from a dark-brown, clay-rich Terra  
284 fusca horizon (II TBv) to a bright yellowish, silty Bv horizon that apparently resembles  
285 loess which at some time buried a prior developed Terra fusca. Roots were present  
286 throughout the whole profile and even in the deepest crack fillings. Although we  
287 sampled the whole profile for bulk soil analysis, only the soil-rock transition zone of  
288 the red clay in the cracks was studied by micromorphology. Bulk samples of the crack  
289 infillings were taken in the upper and lower part of the crack (samples III Tu (1) and  
290 (2). The crack fillings are homogeneous and no horizons or indicators of fluvial  
291 deposition could be observed (fig. 2c). As well, the bedrock was sampled and  
292 analyzed for calcium carbonate, total element contents, residue particle sizes, and  
293 residue color.

294

295

296 Figure 1

297 Figure 2a

298 Figure 2b

299 Figure 2c

300

301 The second profile 'Schwaighauser Forst' is located at the eastern border of  
302 Franconia, locally called *Bruchschollenland*, an area characterised by strong faulting  
303 and dislocation of geological units. Therefore very different lithologies are exposed at  
304 the surface in small areas, and some volcanic activity about 50 km to the east was  
305 associated with the faulting. The studied soil represents an Epileptic Cambisol

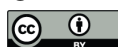

(clayic) according to the WRB (WRB 2014). According to the German soil classification system (Ad-hoc AG Boden, 2005) it can be classified as Terra fusca. It is located in an educational soil trail (N 49° 05' 10.7", E12° 00' 12.7") north-west of the city of Regensburg (TUM 2014), formed on dolomitic limestone from the Upper Jurassic/Malm  $\epsilon$ - $\zeta$ . At this profile, a loess cover is not discernible, but may have eroded since the solum is much shallower than at the first profile (figs. 3a and 3b). Roots were present throughout the whole profile. Apart from each horizon, the bedrock was analyzed for calcium carbonate, total element contents, residue particle sizes, and residue color.

315

316

317 Figure 3a

318 Figure 3b

319

#### 320 4. Methods

Our main aim was to check whether partially replaced microfossils can be found in the rock-soil transition zones of the sampled profiles, supported by some analyses of bulk soil and bedrock residue in order to describe soil development intensity. Micromorphological samples were taken from the transition of the unweathered bedrock to the clay of Terra $\epsilon$  calcis, including several samples covering the whole distance from the apparently unweathered rock till clay aggregates of the solum. Thin but stable metal containers were placed on the transition of soil and rock and the samples slowly cut out with a knife. After freeze drying, samples were stabilized using Araldite A2020 epoxy resin. The thin sections received a diamond-polishing and were





330 carbon coated. After optical analysis, microanalysis was done with a high resolution  
331 field-emission scanning electron microscope (FESEM; Carl Zeiss Ultra 55 Plus),  
332 equipped with an energy-dispersive system (EDS) by Thermo Fisher Scientific. In  
333 contrast to only optical analysis, scanning electron microscope analysis with EDS  
334 permits determining the geochemistry of the studied areas. This can allow detecting  
335 minerals that appear amorphous to X-ray diffraction and optical studies. In addition,  
336 large allochthonous clays such as biotite grains can be misinterpreted as in-situ  
337 formed minerals as shown by Lucke et al. (2012) if only optical analysis is applied,  
338 and the scanning electron microscope (SEM) allows investigating smaller features at  
339 scales of nanometers.

340

341 General soil analyses determined calcium carbonate and organic carbon contents  
342 with a Leco TrueSpec C-N analyser measuring samples before and after ignition of  
343 organic matter at 430 °C for two hours (Schlichting et al., 1995), based on the  
344 assumption that the remaining content of C represents carbon bound in calcium  
345 carbonate. The dolomite content of the dolomitic limestone was estimated from the  
346 residue mass after dissolution of the calcareous part of the rock with 10% HCl. Soil  
347 color of dry soil samples and the color of dried bedrock residue after dissolution with  
348 10% HCl were determined using the Munsell color chart, and redness ratings  
349 calculated according to Hurst (1977). In order to control whether the treatment of the  
350 rock with 10% hydrochloric acid could lead to a loss of red color of the residue,  
351 samples of the Terra rossa limestone crack infillings were simultaneously treated with  
352 the same amount of acid during the same time of bedrock dissolution, but no color  
353 change could be observed. Analysis of clay minerals would require rock dissolution



354 with weaker acids in order to exclude alteration of the minerals due to acid treatment  
355 (Ostrom, 1961; Rabenhorst and Wilding, 1984), but since only the texture and color  
356 of the residue were studied, faster treatment with stronger acid was chosen.

357

358 Pedogenic iron oxides were extracted with sodium dithionite at room temperature  
359 according to Holmgren (Schlichting et al. 1995), and the iron contents measured with  
360 an ICP Spectrometer (Thermo Scientific iCAP 6200 Duo). In case samples contained  
361 more than 4%  $\text{CaCO}_3$ , particle sizes were analyzed after removing  $\text{CaCO}_3$  with 10%  
362 hydrochloric acid and washing the samples until conductivity dropped below 200  $\mu\text{S}$ .  
363 These and the other samples containing less than 4%  $\text{CaCO}_3$  were then dispersed  
364 with sodium hexametaphosphate ( $\text{Na}_4\text{P}_2\text{O}_4$ ) and shaken overnight (Schlichting et al.,  
365 1995). Wet sieving determined the sand fraction according to DIN 19683 (1973),  
366 while the smaller particles were analysed with a Sedigraph (Micromeritics). For total  
367 element analysis by X-ray fluorescence, we determined the loss on ignition (LOI) by  
368 weighing the powdered samples before and after drying: 1) 12 hours at 105 °C in a  
369 cabinet dryer and 2) 12 hours at 1030°C in a muffle furnace. Major element oxides  
370 ( $\text{SiO}_2$ ,  $\text{TiO}_2$ ,  $\text{Al}_2\text{O}_3$ ,  $\text{FeO}$ ,  $\text{MnO}$ ,  $\text{MgO}$ ,  $\text{CaO}$ ,  $\text{Na}_2\text{O}$ ,  $\text{K}_2\text{O}$ ,  $\text{P}_2\text{O}_5$ ) and selected trace  
371 elements (Ba, Cr, Ga, Nb, Ni, Pb, Rb, Sr, Th, V, Y, Zn, Zr) were measured with a  
372 Spectro XEPOS at the GeoZentrum Nordbayern. Precision and accuracy are  
373 generally better than 0.9% and 5%, respectively.

374

## 375 5. Results

### 376 5.1 Micromorphology of the rock-soil transition zones



377 Limestone beddings partially consisting of clay could be found in the rock-soil  
378 transition zones of both studied profiles. Figure 4 shows a calcite grain partially  
379 consisting of clay in the 'powdery' (see Trappe, 2011) transition zone of about 1 mm  
380 thickness, directly between the red clay and the limestone in the profile 'Fricke'. It  
381 appears that a prograding solution is encompassed simultaneously by the formation  
382 of clay. As shown by the serrated grain rim in fig. 4 (upper part), exchange seems to  
383 occur along zones of potential permeability such as fine fissures, grain contacts, or  
384 through pores. That part of the calcite already consists of clay is shown by the  
385 spectral image in fig. 4 (lower part). Although secondary calcite needles were noted  
386 in some fissures, no clay could be observed in the pores: there are no clay films  
387 suggesting that allochthonous clay has been transported into the rock. As well, the  
388 original form of the calcite grain is so well preserved that the clay cannot be of  
389 allochthonous origin, but must represent the in-situ limestone, and there is no  
390 structure discernible that could be attributed to micro-clay beddings deposited during  
391 limestone formation. Conclusively, bedrock weathering may not simply proceed by  
392 chemical reaction processes which create voids in the rock due to chemical  
393 dissolution, but clay neoformation and rock dissolution could be part of the same  
394 process as suggested by Merino and Banerjee (2008).

395

396 Figure 4

397

398 About 1 cm deeper into the limestone, it appears rather unaltered to the naked eye  
399 and remains of biogenic shells can be observed macroscopically. But there are also



400 some small reddish lines. Analysis with the SEM confirmed that some of these lines  
401 represent clay, which is partly present inside microfossils. Figure 5 shows a biogenic  
402 relict (probably alga or foram) partially consisting of clay which is surrounded by still  
403 largely unweathered limestone. Again, there is no evidence that the clay was  
404 transported into the microfossil, since the outer shell is still closed and consists of  
405 calcium carbonate. Though the outer shell seems preserved and closed, consisting of  
406 calcium carbonate, one has to account for the three-dimensionality of the organism  
407 and a high likelihood of pores. But the apparently amorphous structure of the clay  
408 inside the microfossil argues against allochthonous clay minerals. Furthermore, it still  
409 contains significant amounts of the former calcium carbonate filling (see spectral  
410 images in fig. 5).

411

412 Figure 5

413

414 The Terra fusca of the Schwaighauser Forst profile formed on a dolomitic limestone  
415 that is characterized by low density of microfossil remains in the rock. Yet, some  
416 microfossils partially consisting of clay could be observed in the direct soil-rock  
417 transition zone, inside the rock in about 10  $\mu\text{m}$  distance to the border of the limestone  
418 as shown in figure 6. This microfossil is characterized by high contents of magnesium  
419 corresponding to bedrock chemistry. The minor Si peak that is detected in the inner  
420 section might either derive from naturally implemented traces of silica or indicates  
421 authigenic neoformation of clay, too.

422



423 Figure 6

424

425 In a clay-filled fissure of the dolomite rock beneath the Terra fusca, we investigated  
426 serrated structures partly showing areas that appear darker in the SEM. Figure 7  
427 shows a calcite grain directly bordering the clay-filled fissure. The EDS-analyses  
428 show how the calcite at the edge starting to disintegrate contains already some silica  
429 and magnesium (point 1). Since magnesium might also be a component of the  
430 carbonate, one might argue for an analytical effect because of the beam size. This,  
431 however, does not fall below under 1.5  $\mu\text{m}$  in diameter in this case, such that the  
432 analyzed microvolume is restricted to the calcitic part of the grain. Comparison with  
433 the elemental composition of the clayey crack fill with the clay in the fissure (point 2),  
434 in particular regarding the Al:Si ratios, shows a clear clay mineral signal with a  
435 strongly reduced calcium content.

436

437 Figure 7

438

439 The replacement of calcium and magnesium by clay seems further indicated by an  
440 EDS cross-section (line scan) through a dolomite grain about 50  $\mu\text{m}$  deeper into the  
441 bedrock (fig. 8). A darker domain of the dolomite proves as clay, characterized by a  
442 significant decline of Ca and Mg, while Si, Al, and Fe increase. However, this clay  
443 seems not yet fully de-calcified, and appears merely like an amorphous gel. We have  
444 not been able to identify crystallinity, and the area is too small to be determined by  
445 optical analysis, which would misinterpret it as calcite.



446

447 Figure 8

448

## 449 5.2 Bulk soil analysis

450 Results of both profiles are summarized in table 1. It can be observed that the Terra  
451 rossa red crack filling samples of the Fricke profile [samples Tu(1) and Tu(2)] are  
452 more or less identical, confirming the field impression that no horizons or deposition  
453 patterns are present in the cracks. However, the fills are distinct from the Terrae  
454 fuscae: apart from the red color, values of dithionite soluble iron are elevated. As well,  
455 values of oxalate-soluble silicium are elevated, pointing to a higher content of  
456 amorphous silica than in the Terrae fuscae.

457

458 The Terra rossa crack fillings are characterized by higher clay contents than the  
459 Terrae fuscae, but also by a higher sand content than the bedrock residue. The latter  
460 could to some degree be connected with the acid treatment to dissolve the rock. The  
461 crack infillings received no acid pre-treatment before grain size analysis due to low  
462  $\text{CaCO}_3$ -contents, and since acid-pretreatment also removes calcite sand grains  
463 (Lucke and Schmidt, 2015), sand contents of crack infillings and bedrock residue are  
464 not directly comparable. Calcite sand grains in the Terra rossa-filled cracks might  
465 represent micro-"floaters" as suggested by Meert et al. (2009) regarding limestone  
466 blocks of larger scale "floating" in the Bloomington Terra Rossa in Indiana. However,  
467 the majority of sand grains in the crack fillings consist largely of rounded quartz  
468 grains of the finer sand fractions (6% coarse sand, 47% middle sand, 47% fine sand),



469 with some equally rounded black grains that might reflect a primary detrital input.  
470 While some quartz grains of the coarse-sand fraction show densely set small V-  
471 shaped marks typical for aeolian transport during loess deposition (fig. 9), there are  
472 also grains being completely covered by clay minerals that are unsuitable for a grain  
473 surface characterization (fig. 10).

474

475 Figure 9

476 Figure 10

477

478 This suggests that allochthonous material, including grains transported with the  
479 overlying loess, was involved in the formation of the crack fills. The very similar sand  
480 contents in the two samples of crack fillings point to a very homogeneous distribution  
481 of sand within the cracks, which is in agreement with the field impression and other  
482 results of bulk soil analysis. The strongly elevated sand contents compared to the  
483 bedrock residue argue against inheritance from rock dissolution, and the absence of  
484 fluvial sorting and very homogeneous distribution of sand grains in the clay argue  
485 against fluvial deposition of the crack fills.

486

487 Although the crack fillings were affected by loess deposition on the surface, lab  
488 results support the field impression that two different soil formation processes took  
489 place. Very similar Ti/Zr values of the lower Terra fusca at the profile Fricke [sample II  
490 TCv] and the Terra rossa red clay crack fillings let a common parent material seem



491 possible, which is different from the limestone residue. Although it cannot be ruled out  
492 that clay-rich beds - now removed due to weathering - provided residue contributing  
493 to soil formation, the analyzed rock sample suggests that neither the buried Terra  
494 fusca nor the Terra rossa crack fillings originated from the residue of the now  
495 adjacent limestone.

496

497 Table 1

498

499 The limestone and dolomitic limestone proved to be very pure with acid-soluble  
500 fractions of 98.1% and 99.99%. Their residue is extremely clay-rich compared to the  
501 crack fillings and the II TCv sample of the Terra fusca of the Schwaighauser Forst  
502 profile. As well, Ti/Zr ratios are different between rocks and soils, although there are  
503 gradients visible in the profiles. These supports the field impression that loess was  
504 deposited on the surface and mixed with pre-existing Terrae calcis, leading to a  
505 gradual lowering of the Ti/Zr ratio towards the tops of the profiles. Even though there  
506 was no loess addition apparent in the Schwaighauser Forst profile, particle sizes  
507 clearly support that silty material was mixed into the soil. This is further stressed by  
508 the absolute content of dithionite-soluble iron, indicating that less weathered material  
509 was deposited on top of the profiles. However, in contrast to the other parameters,  
510 Fe(d/t) ratios suggest that weathering intensity remained nearly constant through the  
511 profiles. This is not an uncommon phenomenon: Günster (1999) and Lucke (2008)  
512 encountered similar Fe(d/t) values in Terrae calcis of southern Spain and northern  
513 Jordan, which did not match other indicators of pedogenesis intensity. It could be





514 explained assuming that some of the dithionite-extractable iron in well-developed  
515 Terraes calcis might not result from oxidation of  $\text{Fe}^{2+}$  during weathering, but represents  
516 pre-weathered  $\text{Fe}^{3+}$ -rich phyllosilicates released from the rock residue – or enters the  
517 system from outside as  $\text{Fe}^{3+}$ . The latter might be happening when mineral  
518 neoformation due to isovolumetric replacement, illuviation of amorphous clay, or dust  
519 deposition contribute to soil formation.

520

521 The contents of organic matter and calcium carbonate are mostly low throughout the  
522 profiles. The Terraes fuscae seem to contain more organic material than the Terra  
523 rossa of the crack fillings, which matches expectations. However, in the profile Fricke  
524 only the Ah-horizon contains a relatively high amount of organic matter, while the  
525 lower horizons have only little more than the crack fillings. On the one hand, it is  
526 surprising that the crack fillings do contain organic matter at all, since they seemed  
527 disconnected from the present surface. On the other hand, roots occur in limestone  
528 fissures even in great depth, so that the organic matter present in the limestone  
529 cracks most likely represents roots.

530

531 pH values are mostly neutral – only in the upper part of the Fricke profile values  
532 between 4.5 – 5.5 can be observed, but this matches the high amount of organic  
533 matter and the field impression that the parent material of this part of the profile is  
534 mainly decalcified loess. There is no difference of the pH values of the red clay  
535 infillings of the limestone cracks and the Terra fusca of Schwaighauser Forst. In this



536 context, the bedrock residue of both profiles is not red, but brown and greyish brown.

537 Therefore it seems unlikely that the color was inherited from the bedrock residue.

538

539 Last but not least, calcium carbonate values are low throughout all profiles, except in  
540 the TCv horizon of the Terra fusca developed on dolomitic limestone in the  
541 Schwaighauser Forst profile. Apparently the dolomite has not completely been  
542 weathered, and thin sections showed that calcium carbonate re-precipitated in the  
543 soil matrix.

544

## 545 **6. Discussion**

### 546 **6.1 Parent materials**

547 It is evident that the investigated Terrae fuscae and Terra rossa crack fillings cannot  
548 represent only bedrock residue. This is indicated by the differences of color and  
549 particle size between the soils and bedrock residues. In addition, grains of the sand  
550 fraction of the crack fills confirm that there has been a deposition of material from the  
551 covering loess into the fills. Moreover, at the microscale it seems possible that  
552 metasomatic processes took or take place in the direct rock-soil transition zones of all  
553 investigated profiles, leading to replacement of bedrock with clay in the  
554 approximately outer 50  $\mu\text{m}$  of the bedrock. In this context, clay neoformation seems a  
555 gradual replacement process: the SEM observations point to a gradual exchange of  
556 Ca and Mg against Si, Al, and Fe. Newly formed (authigenic) clay appears as gel-like  
557 material, distributed along calcite as well as dolomite grain boundaries, or in patches  
558 and small domains within and around decaying carbonate rock and its incorporated



559 microfossils. No crystallinity can be identified. Often, the contact between  
560 calcite/dolomite and clay is present as an irregularly prograding, indenting front,  
561 which is important to note as it constrains a simultaneous transformation from one  
562 mineral to the other.

563

## 564 **6.2 Amorphous (metasomatic?) clays**

565 All clays occurring in microfossils and minerals are connected to grain boundaries,  
566 fissures, and pores occurring within the soil-rock transition zone, while the unaltered  
567 rock in areas remote from fissures lacks those observations. Thus underlines a  
568 correlation between the replacement process and the movement of solutions in the  
569 rock. There are no deposition structures such as oriented crystalline clay layers that  
570 could be connected with illuviation. However, it cannot be ruled out that amorphous  
571 clay is transported into the transition zones. If amorphous phyllosilicates are  
572 transported by percolating waters as proposed by Frolking et al. (1983), they are  
573 apparently not accumulating in voids, but adhere to calcite and dolomite grain  
574 surfaces. Most of the observed phyllosilicates contain iron, implying that it has either  
575 been transported as coating of amorphous clay minerals, or as ions. At few locations  
576 secondary  $\text{CaCO}_3$  needles precipitated near fissures, suggesting at least temporary  
577 presence of solutes in the pore water. There is no discernible microstructural  
578 difference between Terra fusca and Terra rossa in the scanning electron microscope  
579 images.

580

## 581 **6.3 Bulk soil analysis**



582 Bulk soil analyses let it seem possible that replacement and/or transport of  
583 amorphous clays contributed more to the genesis of Terra rossa in the crack fillings  
584 since the contents of oxalate-soluble silica are higher in the Terra rossa. However,  
585 there is no reason to assume that higher contents of organic matter in Terrae fuscae  
586 prevent or strongly limit processes of metasomatism and/or transport of amorphous  
587 clays. This argues against Blanck's (1915) suggestion that topsoil organic matter  
588 contents play a role in Terrae calcis genesis. In this context, the very similar pH  
589 values of the Terra rossa crack infillings and the Terrae fuscae suggests that the pH  
590 value does not play a major role for the development of red or brown color – at least  
591 if assuming that the actual pH is relevant for amorphous clays and the formation of  
592 replacement features. Similarly, it does not seem probable that organic matter  
593 contents affect the color of Terrae calcis since the differences between Terra rossa  
594 and Terra fusca are not very pronounced, at least in the Fricke profile.

595

596 The Terra rossa and Terrae fuscae are characterized by similar particle sizes. At both  
597 sites the particle sizes indicate deposition of loess in the upper part of the profiles.  
598 Since the bedrock residue is at both profiles characterized by much finer particle  
599 sizes, it seems unlikely that the residue of bedrock dissolution contributed a major  
600 part of the solum. This is further supported by the Ti/Zr ratios, which are different  
601 between the rock and overlying soil. They indicate that loess did not provide the main  
602 parent material of Terrae calcis genesis, but altered soil properties during deposition  
603 on pre-existing soils. There is a strong similarity between the Terra rossa crack fillings  
604 and lower part of the Terra fusca in the Fricke profile, which lets it seem possible that  
605 similar parent material was involved in formation of these soils. Whether this was



606 aeolian dust cannot be deducted from the available data: the Ti/Zr ratios support the  
607 impression of loess deposition and mixing only into the upper part of the profiles, but  
608 do not deliver insights into possible aeolian parent materials of earlier pedogenesis.  
609 Here the dominant finer sand fractions in the Terra rossa crack fillings, as well as the  
610 absence of horizons or depositional structures connected with fluvial sediments,  
611 support that an early phase of aeolian sedimentation might have been connected  
612 with formation of the red fills. These aerosols could have delivered elements driving  
613 replacement reactions as well. The very homogeneous distribution of sand grains in  
614 the clay of the crack fill speaks against fluvial sorting patterns. The most likely  
615 explanation how sand grains entered the cracks seem root channels and shrink-swell  
616 cracks in the clay, while the dominance of the finer sand fractions indicates an  
617 aeolian source of the grains – possibly largely from loess deposition.

618

619 Similar to the sand, small aggregates consisting of silt and clay could have been  
620 transported into the limestone cracks by wind and bioturbation. Fedoroff and Courty  
621 (2013) suggested that wind-blown transport of clayey pseudosands from pre-existing  
622 red soils contributed to the genesis of many Terrae calcis, possibly following events  
623 of sudden and considerable pressure such as airbursts during cosmic impacts. Apart  
624 from the presented sand grains, we could not observe pseudosand structures in the  
625 clay matrix of the studied profile, but they could have been lost during shrink-swell  
626 processes. Such processes could also have blurred clay illuviation cutans in the  
627 solum (Fedoroff and Courty, 2013).

628



629 One major question is the iron dynamics of the studied soils. The absolute amounts  
630 of dithionite-soluble iron suggest that the Terra rossa crack infillings contain more  
631 pedogenic iron than the *Terrae fuscae*. This could indicate that iron dynamics are  
632 connected with organic matter contents as suggested by Blanck (1915), since higher  
633 contents of dithionite-soluble iron seem to correspond to lower values of organic  
634 matter. However, there is no correlation to the pH-value, and more important, no  
635 correspondence to the Fe(d/t) ratio. According to Cornell and Schwertmann (2003),  
636 this ratio can be interpreted as indicator of Fe<sup>2+</sup> oxidation to Fe<sup>3+</sup>, which is usually a  
637 marker of mineral weathering and pedogenesis. Since it remains more or less  
638 constant in nearly all investigated samples, this essentially contradicts the impression  
639 of stronger weathering given by the particle sizes in the lower part of the profiles. The  
640 Fe(d/t) ratio has been problematic in other studies of Terra calcis soil development.  
641 For example, Günster (1999) suggested that it should be modified by the clay content  
642 in order to achieve reasonable results not contradicting other indicators of soil  
643 development intensity, since he observed a strong correlation of Fe<sub>d</sub>-contents with  
644 clay in southern Spain. In contrast, Lucke (2008) found that the contents of Fe<sub>d</sub> in  
645 *Terrae rossae* of northern Jordan showed some correlation to contents of calcium  
646 carbonate, and suggested modifying the index with the calcium carbonate content.

647

648 At the studied profiles in Franconia, however, those two modifications are  
649 inapplicable since there is no apparent connection between the contents of iron,  
650 calcium carbonate, and particle sizes. Since limestone might contain trivalent iron  
651 from sediments, the problematic Fe(d/t) values could be explained by pre-weathered  
652 bedrock residue. However, in light of our microstructural and analytical results



653 regarding clay neoformation, a different hypothesis is formulated here: that not only  
654 'classical' pedogenesis is connected with the Fe(d/t) ratios in Terrae calcis. Instead,  
655 we regard it possible that the iron content is affected by neoformation of  
656 phyllosilicates involving the transport of external  $\text{Fe}^{3+}$  ions. If we assume that  
657 aluminium, which is hardly soluble at neutral pH values, can be transported into the  
658 rock-soil transition zone, it seems possible that iron can be transported too, possibly  
659 involving the same transport mechanism.  In this context, iron transport by thermal  
660 waters due to volcanism seems possible in the geological context of the  
661 Schwaighauser Forst profile, although there is no direct evidence for that. However,  
662 the Fricke profile seems located rather far from zones of volcanic activity, and there  
663 are so far no clear indications of volcanic ash deposition.

664

665 It seems certain that metasomatism and/or illuviation of amorphous clays can  
666 contribute to Terra calcis genesis regardless of the climate or temperature. Further, it  
667 seems likely that the development of red color is connected with strong wetting and  
668 drying cycles as suggested by Cornell and Schwertmann (2003). Related to this, we  
669 think it possible that the Terra rossa of the limestone crack infillings of the Fricke  
670 profile was subject to stronger climatic switches than the upper part of the profile - or  
671 only the upper part was subject to xanthization.

672

#### 673 **6.4 Evidence from related studies**

674 Küfmann (2008) observed that the thickness of Terrae calcis in the northern  
675 calcareous Alps was linearly correlated to the proportion of insoluble residue of



676 limestone bedrock. However, her calculation of the possible contribution of bedrock  
677 residue (about 20%) and aeolian deposits (about 50%) during the Holocene could  
678 explain only about 70% of the present soil thickness. Longer time periods of soil  
679 formation do not seem probable since the Alps were glaciated during the Pleistocene.  
680 The missing part might be the contribution by isovolumetric replacement and/or  
681 illuviation of amorphous clays, which could also explain the positive correlation of soil  
682 depth with bedrock residue. Since the metasomatic model of Merino and Banerjee  
683 (2008) predicts that acids are produced during the replacement process, non-  
684 soluble residue of the limestone rocks also contributes to soil development: more  
685 residue will be released in less pure limestones, leading to quicker build-up of the  
686 profile.

687

688 For now it has to be left open how the transport mechanism leading to  
689 superconcentration of ions in the rock pores can be explained, but we think that roots  
690 which are present in larger rock fissures and even in the deepest part of the studied  
691 clay-filled cracks seem the most probable transport agents. Verboom et al. (2009)  
692 found that roots of eucalypts colonizing sand dunes in Western Australia were  
693 capable of transporting Al, Fe, and Si, leading to the construction of clay pavements  
694 along the roots in a geochemically alien surrounding. The same elements were found  
695 in the amorphous clays of our studies, which indicates that these probably represent  
696 largely authigenic, newly formed clay minerals that stem from reactions triggered by  
697 plant roots.

698





699 Our study suggests that bulk soil and rock analyses alone can deliver only limited  
700 insight into Terraes calcis development, at least at sites where clay neoformation  
701 contributes significantly to the genesis of these soils. It appears that bedrock  
702 weathering does not only proceed by chemical reaction processes which create voids  
703 in the rock due to dissolution, but that neoformation of new minerals and rock  
704 dissolution can be part of the same process. Unfortunately it was not yet possible to  
705 study the mineralogy of the crystalline clays. In the future, a better understanding of  
706 mineral crystallization out of the observed apparently amorphous clays could help to  
707 better explain the factors controlling Terraes calcis formation.

708

## 709 7. Conclusions

710 Our study found amorphous clays in the direct rock-soil transition zones of all studied  
711 profiles. Although it cannot be stated whether these are ongoing or relic features, it  
712 can be concluded that:

713 - Isovolumetric replacement of limestone due to metasomatism and/or illuviation of  
714 amorphous clays took or takes place in Terraes fuscae as well as Terraes rossae in  
715 Franconia.

716 - Current topsoil organic matter contents and soil color apparently do not matter for  
717 the occurrence of these features.

718 - Amorphous clays are observed only close to micropassages in the rock-soil  
719 transition zone, suggesting that rock pore solutions play a role for their occurrence.

720 These clays do not fill voids, but are present only in contact with calcite structures.



721 - There is a gradual transition between calcareous minerals and amorphous clay, and  
722 no sharp boundary as would be expected from dissolution and deposition processes.

723 - The presence of Fe suggests that replacing amorphous clays are either iron-coated  
724 during illuviation, or Fe-ions are transported in a similar way as Al and Si. Since the  
725 same elements can be found in clay pavements around Eucalyptus roots in Western  
726 Australia, this suggests that root activity might play a major role for the formation of  
727 amorphous clays.

728 - No crystalline illuvial clay could be observed in pores, but allochthonous sand was  
729 deposited into the limestone cracks during loess deposition by wind and bioturbation.  
730 It seems well possible that pseudosand clay aggregates contributed to the solum.  
731 These might explain a part of the substrate, but not the amorphous clays observed in  
732 the rock-soil transition zones.

733 - The investigated Terrae calcis represent true soils and not claystones, since they  
734 contain a significant share of allochthonous material and are subject to processes  
735 induced by plants – which, by definition, means that pedogenesis takes place.

736

737 We conclude that replacement processes can contribute to the genesis of Terrae  
738 calcis in Franconia. It is not yet possible to quantify their contribution, and the  
739 mechanisms of the process cannot yet fully be explained. However, further studies  
740 should consider the possible role of plants for authigenic clay neoformation in Terrae  
741 calcis genesis.

742

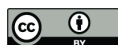

## 743 **References**

- 744 Ad-hoc AG Boden, 2005. Bodenkundliche Kartieranleitung. 5th edn. Stuttgart,  
 745 Schweizerbart.
- 746 Amram, K., and Ganor, J., 2005. The combined effect of pH and temperature on  
 747 smectite dissolution rate under acidic conditions. *Geochim. Cosmochim. Acta* 69:  
 748 2535–2546.
- 749 Banerjee, A., and Merino, E., 2011. Terra rossa genesis by replacement of limestone  
 750 by kaolinite. III. Dynamic quantitative model. *The Journal of Geology* 119(3): 259-  
 751 274.
- 752 Barrón, V., and Torrent, J. (2002). Evidence for a simple pathway to maghemite in  
 753 Earth and Mars soils. *Geochimica et Cosmochimica Acta*, 66(15): 2801-2806.
- 754 Blanck, E., 1915. Kritische Beiträge zur Entstehung der Mediterran-Roterde. Die  
 755 Landwirtschaftlichen Versuchsstationen LXXXVII, Berlin: 251–314.
- 756 Blanck, E., 1926. Vorläufiger Bericht über die Ergebnisse einer bodenkundlichen  
 757 Studienreise im Gebiet der südlichen Etschbucht und des Gardasees. *Chem. Erde* 2:  
 758 175–208.
- 759 Blanck, E., Giesecke, F., Rieser, A., and Scheffer, F., 1928. Über die Entstehung der  
 760 Roterde im nördlichsten Verbreitungsgebiet ihres Vorkommens. *Chem. Erde* 3: 44–  
 761 90.
- 762 Blanck, E., 1930. Die Mediterran-Roterde (Terra rossa). *Handbuch der Bodenlehre* 3:  
 763 194-257.



- 764 Blanck, E., and Oldershausen, E. v., 1936. Über rezente und fossile Roterde- (Terra  
 765 rossa-) Bildung, insbesondere im Gebiet der südlichen Frankenalb, des  
 766 Altmühltalgebirges. Chem. Erde 10: 1–66.
- 767 Boero, V., and Schwertmann, U., 1987. Occurrence and transformations of iron and  
 768 manganese in a colluvial Terra Rossa toposequence of Northern Italy. Catena 14:  
 769 519–531.
- 770 Bronger, A., Ensling, J., and Kalk, E., 1984. Mineralverwitterung,  
 771 Tonmineralneubildung und Rubefizierung in Terrae Calcis der Slowakei. Catena 11:  
 772 115–132.
- 773 Cornell, R., and Schwertmann, U., 2003. The iron oxides. Weinheim, Wiley, 616 p.
- 774 Danin, A., Gerson, R., Marton, K., and Garty, J., 1982. Patterns of limestone and  
 775 dolomite weathering by lichens and blue-green algae and their paleoclimatic  
 776 significance. Palaeogeogr. Palaeocl. 37: 221–233.
- 777 DIN 19683, 1997. Deutsches Institut für Normung, Blatt 1-3, Physikalische  
 778 Laboruntersuchungen, Bestimmung der Korngrößenzusammensetzung nach  
 779 Vorbehandlung mit Natriumpyrophosphat. Berlin, Beuth Verlag. 2 p.
- 780 Durn, G., Ottner, F., and Slovenec, D., 1999. Mineralogical and geochemical  
 781 indicators of the polygenetic nature of Terra Rossa in Istria, Croatia. Geoderma 91:  
 782 125–150.
- 783 Fedoroff, N., Courty, M.-A., 2013. Revisiting the genesis of red Mediterranean soils.  
 784 Turkish J Earth Sci. 22: doi:10.3906/yer-1205-10.

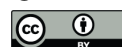

- 785 Feng J.-L., Zhu, L.-P., and Cui, Z.-J., 2009. Quartz features constrain the origin of  
786 terra rossa over dolomite on the Yunnan-Guizhou Plateau, China. *J. A. E. Sci.* 36(2-  
787 3): 156–167.
- 788 Fenelon, P., 1976. Alteration en profondeur des calcaires. *Geografski Glasnik* 38: 75–  
789 82.
- 790 Frolking, T. A., Jackson, M. L., and Knox, J. C., 1983. Origin of red clay over dolomite  
791 in the loess-covered Wisconsin driftless uplands. *Soil Sci. Soc. Am. J.* 47: 817–820.
- 792 Günster, N., 1999. Paläopedologische Untersuchungen an pliozänen und  
793 pleistozänen Sedimenten im Becken von Granada/Südspanien. *Bonner Bodenk. Abh.*  
794 26, 283 p.
- 795 Häusler, W., and Niederbudde, E.-A., 1992. Morphologie und Alter von Böden der  
796 Südlichen Frankenalb und der nichtkarbonatische Mineralbestand der Kalksteine. *Z.*  
797 *Pflanzenernähr. Bodenk.* 155: 391-399.
- 798 Hurst, V. J., 1977. Visual estimation of iron in saprolite. *Geol. Soc. Am. Bull.* 88: 174–  
799 176.
- 800 Ji, H., Wang, S., Ouyang, Z., Zhang, S., Sun, C., Liu, X., and Zhou, D., 2004a.  
801 Geochemistry of red residua underlying dolomites in karst terrains of Yunnan-  
802 Guizhou Plateau. I. The formation of the Pingba profile. *Chem. Geol.* 203: 1–27.
- 803 Ji, H., Wang, S., Ouyang, Z., Zhang, S., Sun, C., Liu, X., and Zhou, D., 2004b.  
804 Geochemistry of red residua underlying dolomites in karst terrains of Yunnan-  
805 Guizhou Plateau. II. The mobility of rare elements during weathering. *Chem. Geol.*  
806 203: 29–50.



- 807 Klinge, H., 1958. Eine Stellungnahme zur Altersfrage von Terra-rossa-Vorkommen  
 808 (Unter besonderer Berücksichtigung der Iberischen Halbinsel, der Balearischen  
 809 Inseln und Marokkos). Z. Pflanzenernähr. Düng. Bodenk. 81(1): 56–63.
- 810 Küfmann, C., 2008. Are Cambisols in Alpine Karst Autochthonous or Eolian in Origin?  
 811 Arctic Ant. Alp. Res. 40(3): 506-518.
- 812 Kubiëna, W., 1945. Beiträge zur Bodenentwicklungslehre: Der Kalksteinbraunlehm  
 813 (Terra Fusca) als Glied der Entwicklungsserie der mitteleuropäischen Rendsina. Z.  
 814 Pflanzenernähr. Düng. Bodenk. 35(1-4): 22–45.
- 815 Laverty, M., 2012. Preparing the ground - new mechanisms for karst and  
 816 speleogenesis: 'altération', fantomisation and replacement. Cave Karst Sc. 39(2): 72–  
 817 76.
- 818 Leiningen, W., Graf zu, 1915. Über die Einflüsse von äolischer Zufuhr für die  
 819 Bodenbildung. Mitt. Geol. Ges. Wien 7: 139–177.
- 820 Leiningen, W., Graf zu, 1930. Die Roterde (Terra Rossa) als Lösungsrest mariner  
 821 Kalkgesteine. Chem. Erde 4: 178–187.
- 822 Lucke, B., 2008. Demise of the Decapolis. Past and present desertification in the  
 823 context of soil development, land use and climate. Saarbrücken, Akademikerverlag,  
 824 231p.
- 825 Lucke, B., Kemnitz, H., and Bäuml, R., 2012. Evidence for isovolumetric  
 826 replacement in some Terra Rossa profiles of northern Jordan. Bull. Mex. Geol. Soc.  
 827 64: 31–45.



- 828 Lucke, B., Kemnitz, H., Bäumler, R., and Schmidt, M., 2014. Red Mediterranean soils  
 829 in Jordan: new insights in their origin, genesis, and role as environmental archives.  
 830 Catena 112: 4–24.
- 831 Lucke, B., and Sprafke, T., 2015. Correlation of soil color, redness ratings, and  
 832 weathering indices of Terrae Calcis along a precipitation gradient in northern Jordan.  
 833 In: Lucke, B., Bäumler, R., Schmidt, M. (eds.), Soils and Sediments as Archives of  
 834 Environmental Change. Geoarchaeology and Landscape Change in the Subtropics  
 835 and Tropics. Fränkische Geographische Gesellschaft, Erlangen: 53-68.
- 836 Lucke, B., Schmidt, U., 2015. Grain size analysis of calcareous soils and sediments:  
 837 inter-method comparison with and without calcium carbonate removal. In Lucke, B.,  
 838 Bäumler, R., and Schmidt, M. (eds.), Soils and Sediments as Archives of  
 839 Environmental change. Geoarchaeology and Landscape Change in the Subtropics  
 840 and Tropics. Erlangen, Franconian Geographical Society: 83-96.
- 841 Maliva, R., and Siever, R., 1988. Diagenetic replacement controlled by force of  
 842 crystallization. Geology 16: 688–691.
- 843 Martin, J.-M., Elbaz-Poulichet, F., Guieu, C., Loye-Pilot, M.-D., and Han, G., 1989.  
 844 River versus atmospheric input of material to the mediterranean sea: An overview.  
 845 Mar. Chem. 28(1-3): 159–182.
- 846 Merino, E., Banerjee, A., 2008. Terra Rossa genesis, implications for Karst, and  
 847 eolian dust: A geodynamic thread. J. Geol. 116: 62–75.
- 848 Meert, J., Pruett, F., and Merino, E., 2009. An “Inverse Conglomerate” Paleomagnetic  
 849 Test and Timing of In Situ Terra Rossa Formation at Bloomington, Indiana. J. Geol.  
 850 117: 126-138.



- 851 Meyer, B., 1979. Die Entcarbonatisierungsrötung als bodengenetischer Teilprozeß.  
 852 Mittlg. dt. bodenkundl. Ges. 29-II: 705-708.
- 853 Monroe, W. H., 1986. Examples of the replacement of limestone by clay. Miss. Geol.  
 854 7: 1–6.
- 855 Moresi, M., and Mongelli, G., 1988. The relation between the Terra Rossa and the  
 856 carbonate-free residue of the underlying limestones and dolostones in Apulia, Italy.  
 857 Clay Miner. 23: 439–446.
- 858 Mortland, M. M., and Raman, K. V., 1968. Surface acidity of smectites in relation to  
 859 hydration, exchangeable cation, and structure. Clays and Clay Minerals 16(5): 393-  
 860 398.
- 861 Mückenhausen, E., Beckmann, H., Schröder, D., and Stephan, S., 1975. Relikte von  
 862 Paläoböden, Spalten- und Dolinen-Füllungen in carbonatischen Gesteinen der  
 863 nördlichen Eifel. Catena 2: 95–106.
- 864 Muhs, D., 2001. Evolution of soils on Quaternary reef terraces of Barbados, West  
 865 Indies. Quat. Res. 56: 66–78.
- 866 Muhs, D. R., Budahn, J., Prospero, J. M., and Carey, S. N., 2007. Geochemical  
 867 evidence for African dust inputs to soils of western Atlantic islands: Barbados, the  
 868 Bahamas and Florida. J. Geophys. Res. 112: 1–26.
- 869 Ostrom, M. E., 1961. Separation of clay minerals from carbonate rocks by using acid.  
 870 J. Sed. Pet. 31(1): 123–129.





- 871 Prognon, F., Cojan, I., Kindler, P., Thirdy, M., and Demange, M., 2011. Mineralogical  
 872 evidence for a local volcanic origin of the parent material of Bermuda Quaternary  
 873 paleosols. *Quat. Res.* 75: 256–266.
- 874 Rabenhorst, M. C., and Wilding, L. P., 1984. Rapid method to obtain carbonate-free  
 875 residues from limestone and petrocalcic materials. *Soil Sci. Soc. Am. J.* 48: 216–219.
- 876 Reifenberg, A., 1927. Über die Rolle der Kieselsäure als Schutzkolloid bei der  
 877 Entstehung mediterraner Roterden. *Z. Pflanzenernähr. Düng. Bodenk.* 10: 159–186.
- 878 Reifenberg, A., 1947. *The soils of Palestine*. London, T. Murby, 179 p.
- 879 Ross, C.S., and Stephenson, L.W., 1939. Calcareous shells replaced by beidellite.  
 880 *Am. Mineral.* 24: 393–397.
- 881 Schlichting, E., Blume, H.-P., and Stahr, K., 1995. *Bodenkundliches Praktikum*. 2nd  
 882 ed. Berlin, Blackwell Wissenschafts-Verlag, 295 p.
- 883 Schmidt, M., Lucke, B., Bäumler, R., al-Saad, Z., al-Qudah, B., Hutcheon, A., 2006.  
 884 The Decapolis region (Northern Jordan) as historical example of desertification?  
 885 Evidence from soil development and distribution. *Quat. Intl.* 151: 74–86.
- 886 Schwertmann, U., Murad, G., Schulze, D.G., 1982. Is there holocene reddening  
 887 (haematite formation) in soils of axeric temperature areas? *Geoderma* 27: 209–223.
- 888 Shijie, W., Hongbing, J., Ziyuan, O., Deqan, Z., Leping, Z., and Tingyu, L., 1999.  
 889 Preliminary study on weathering and pedogenesis of carbonate rock. *Sci. China Ser.*  
 890 *D.* 42(6): 572–581.
- 891 Skowronek, A., 2016. *Terrae calcis*. *Handbuch der Bodenkunde*, Kap. 3.3.2.9, 1–38.



- 892 Stephenson, L. W., 1939. Fossil mollusks preserved as clay replacements near  
 893 Pontotoc, Mississippi. *J. Paleontol.* 13: 96–99.
- 894 Temur, S., Orhan, H., and Deli, A., 2009. Geochemistry of the limestone of Mortas  
 895 Formation and related Terra Rossa, Seydisehir, Konya, Turkey. *Geochem. Intl.* 47:  
 896 67–93.
- 897 Terefe, T., Mariscal-Sancho, I., Peregrina, F., and Espejo, R., 2008. Influence of  
 898 heating on various properties of six Mediterranean soils. A laboratory study.  
 899 *Geoderma* 143(3): 273-280.
- 900 Torrent, J., Barrón, V., and Liu, Q., 2006. Magnetic enhancement is linked to and  
 901 precedes hematite formation in aerobic soil. *Geophysical Research Letters*, 33(2):  
 902 DOI: 10.1029/2005GL024818.
- 903 Trappe, M., 2011. *Sedimentpetrographie, Gliederung und Genese von*  
 904 *Karstsedimenten, dargestellt am Beispiel der Südlichen Frankenalb.* Stuttgart,  
 905 Schweizerbart Borntraeger Science Publishers, 195 pp.
- 906 TUM, 2014. Technische Universität München, Geomorphologie und Bodenkunde:  
 907 Bodenlehrpfad Schwaighauser Forst. <http://www.geo.wzw.tum.de/> [31-08-2015].
- 908 Verboom, W., Pate, J., and Aspandiar, M., 2009. Neoformation of clay in lateral root  
 909 catchments of mallee eucalypts: a chemical perspective. *Ann. Bot.* 105(1): 23–36.
- 910 Weyl, P. K., 1959. Pressure solution and the force of crystallization: a  
 911 phenomenological theory. *Journal of Geophysical Research* 64: 2001–2025.



- 912 WRB 2014. World Reference Base for Soil Resources 2014. International soil  
913 classification system for naming soils and creating legends for soil maps. W. S. Res.  
914 Rep. 106. Rome, FAO, 181 p.
- 915 Yaalon, D., and Ganor, E., 1973. The influence of dust on soils during the  
916 Quaternary. Soil Sci. 116: 146–155.
- 917 Zhu, L., and Li, J., 2002. Metasomatic mechanism of weathering-pedogenesis of  
918 carbonate rocks: I. Mineralogical and micro-textural evidence. Chin. J. Geochem.  
919 21(4): 334–339.
- 920 Zech, W., Wilke, B.-M., and Drexler, O., 1979. Analytische Kennzeichnung von  
921 Karstschlotten-Füllungen in der Fränkischen Alb. Z. Geomorph. N.F., Suppl.-Bd. 33:  
922 182-193.
- 923 Zippe, W., 1854. Einige geognostische und mineralogische Bemerkungen über den  
924 Höhlenkalkstein des Karst. In Schmidl, A.: Die Grotten und Höhlen von Adelsberg,  
925 Lueg, Planina und Laas. Pleiades Publishing Ltd., Vienna: 209-221.

926

927

928 **Figure and table captions**

929

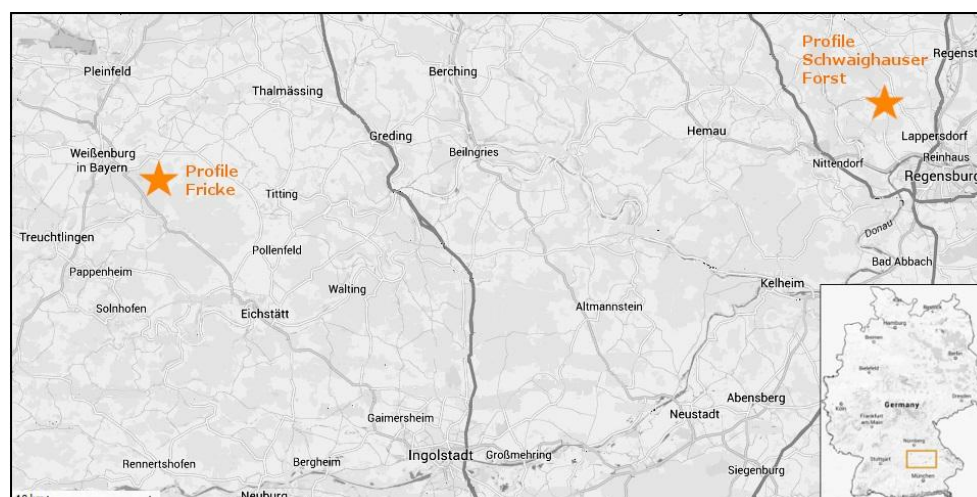

930

931 Figure 1: Map showing the location of the investigated profiles in Franconia, and the  
 932 region inside Germany. Map based on [www.openstreetmaps.org](http://www.openstreetmaps.org) (Open Database  
 933 License, ©OpenStreetMap contributors).

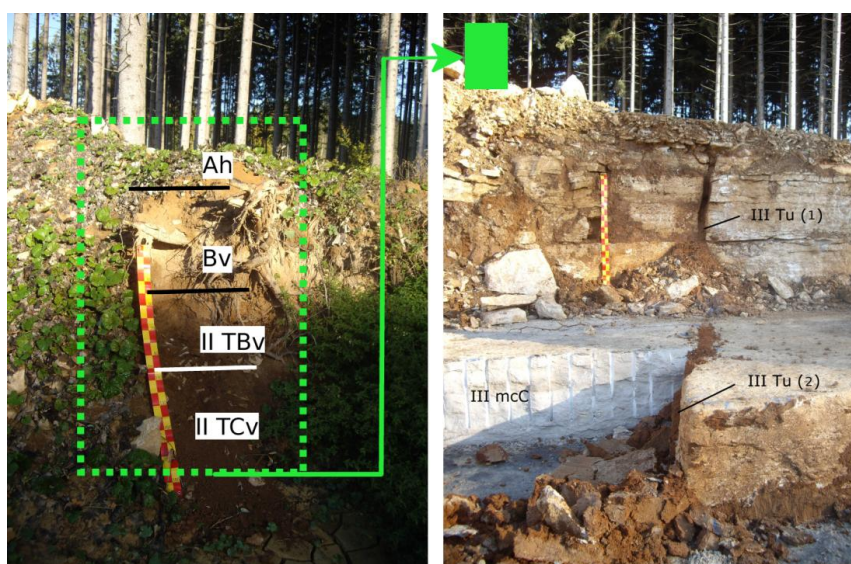

934 Figure 2a: The profile "Fricke" sampled near Weißenburg i. Bayern. The left side  
 935 shows the upper part of the profile, which connects to the lower part shown on the  
 936 right side as indicated by the rectangle. Due to a step-wise exposition of rock cuts in



937 the quarry, it was not possible to obtain a picture showing the whole profile. Sampling  
 938 locations are marked by the horizon labels. Each mark on the meter tape represents  
 939 10 cm.

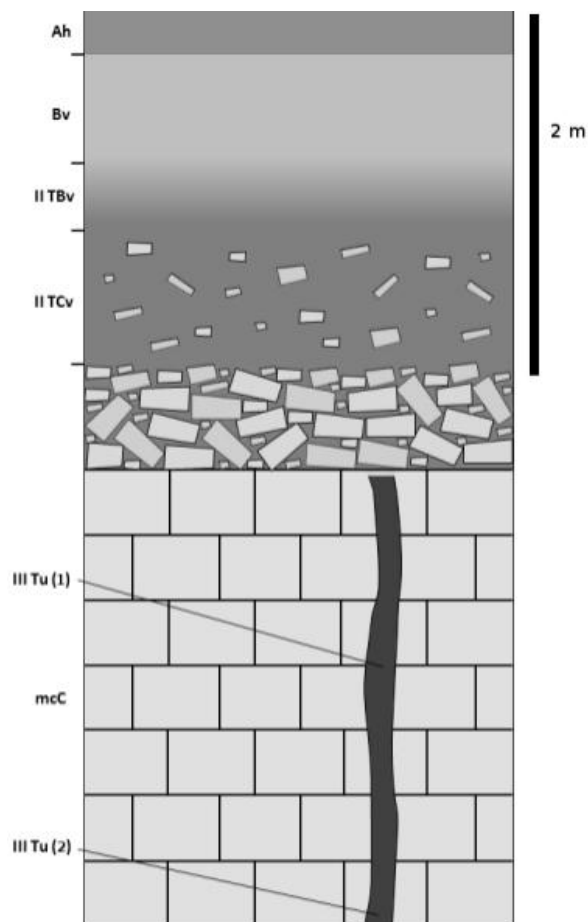

940  
 941 Figure 2b: Schematic drawing of the profile "Fricke" for a better illustration of soil  
 942 horizons.

943

944

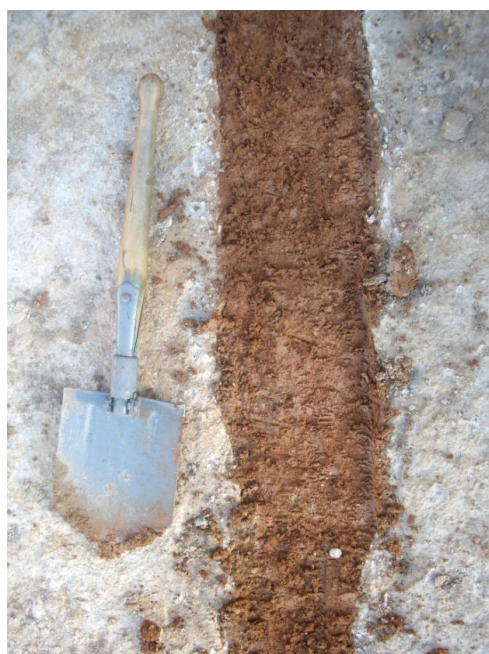

945

946

947 Figure 2c: Close-up of crack infillings. The red clay is homogeneous throughout,  
948 there are no horizons, and no indicators of fluvial deposition could be observed.  
949 Transition to bedrock occurs in a zone of 'powdery' limestone of about 1 mm  
950 thickness as described earlier for other crack fills by Trappe (2011).

951



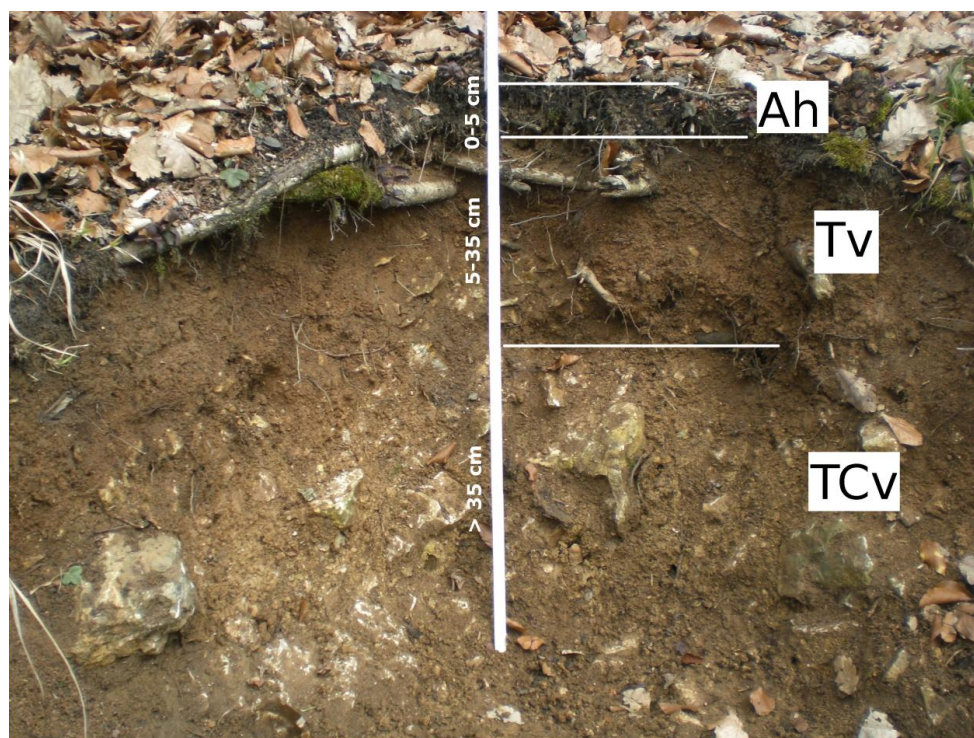

952

953 Figure 3a: The profile "Schwaighauser Forst" near Regensburg. Sampling locations  
 954 are indicated by the horizon labels, and soil depths are marked along the white bar.

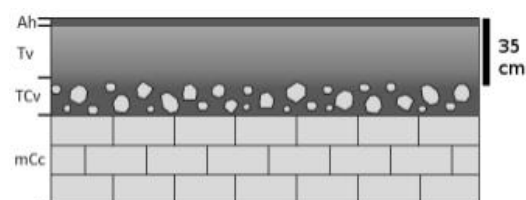

955

956 Figure 3b: Schematic drawing of the profile "Fricke" for a better illustration of soil  
 957 horizons.

958

959

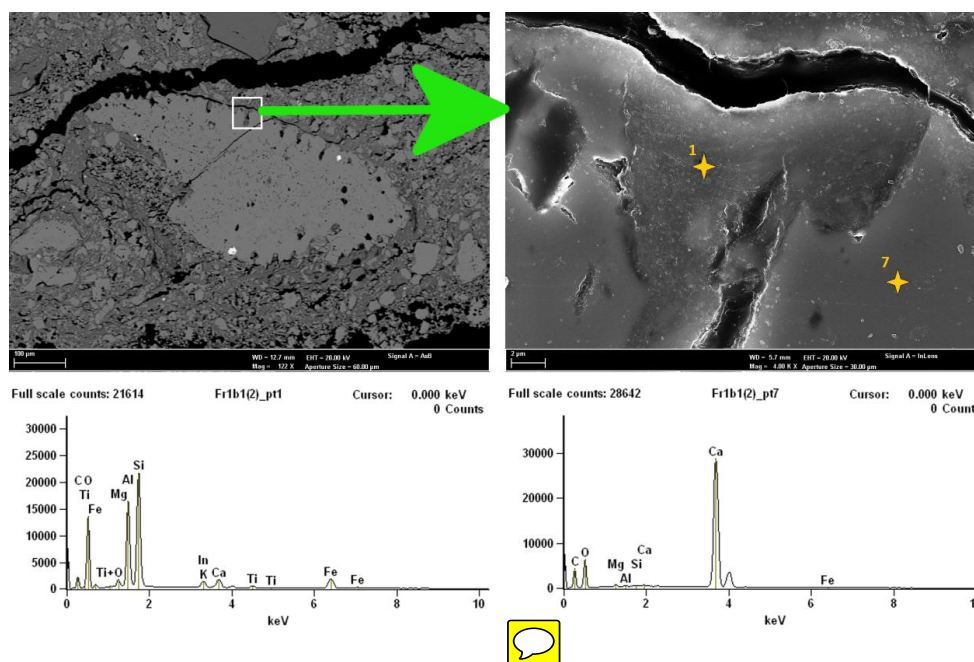

Figure 4: Calcite grain starting to be replaced by clay in the rock-soil transition zone of the Terra Rossa limestone crack fillings in the profile "Fricke". Right is an enlargement of the square marked on the left. The geochemical composition determined by EDS is shown at the bottom for point 1 (left) and point 7 (right), indicating that clay formation maintaining the original bedding structure took place in the darker area of the calcite grain.





972

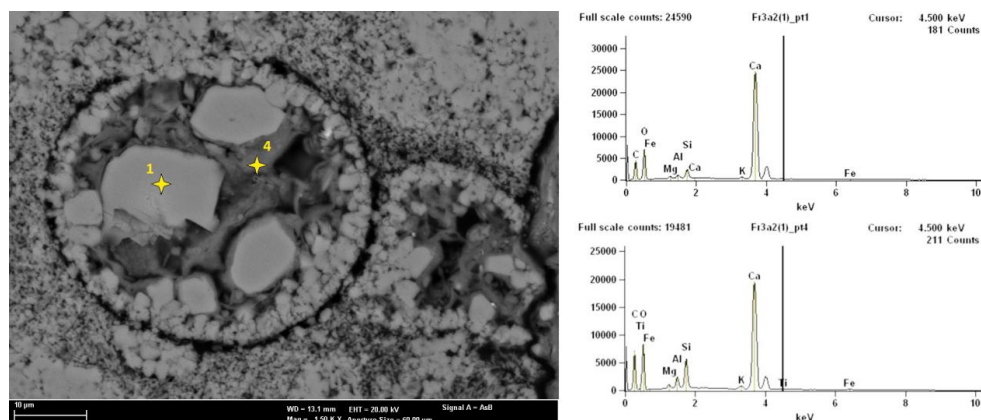

973

974 Figure 5: Round microfossil partially filled with amorphous clay in the rock-soil  
 975 transition zone of the Terra Rossa limestone crack fillings in the profile "Fricke". The  
 976 geochemical composition determined by EDS is shown to the right for point 1 (above)  
 977 and point 4 (below), indicating that part of the inner microfossil consists of clay  
 978 although there are no traces of crystalline allochthonous clay or cracks in the fossil's  
 979 shell.

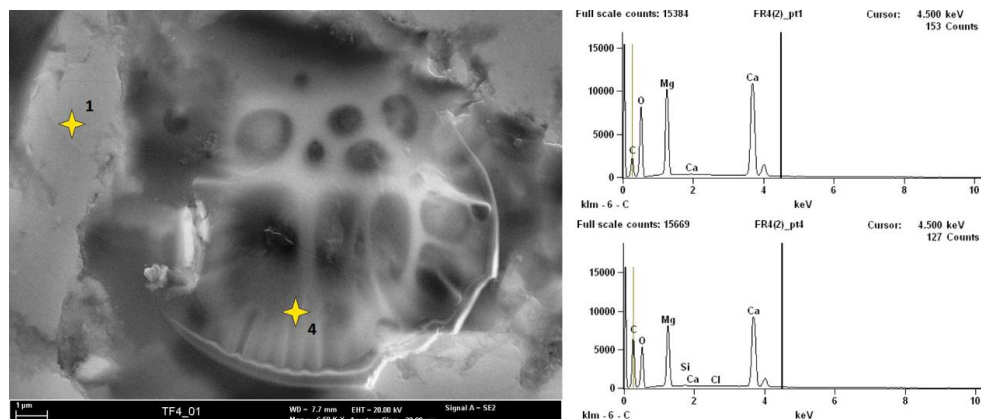

980



981 Figure 6: Remains of a microfossil in the rock-soil transition zone of the dolomitic  
 982 limestone of the "Schwaighauser Forst" profile. EDS-analyses demonstrate the high  
 983 magnesium context of the rock (point 1, top right), but also show a slight increase of  
 984 Si and decrease of Ca and Mg in the darker areas inside the microfossil, indicating a  
 985 beginning of clay formation (point 4, bottom right).

986

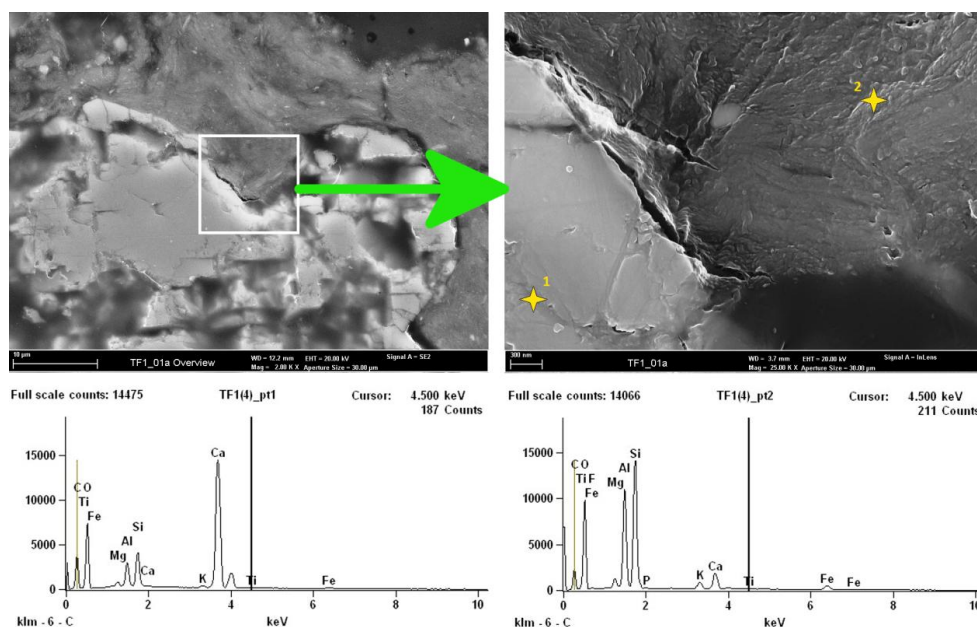

987

988 Figure 7: Calcite grain starting to be replaced by clay in the rock-soil transition zone  
 989 of the Terra Fusca in the profile "Schwaighauser Forst". Right is an enlargement of  
 990 the square marked on the left. The geochemical composition determined by EDS is  
 991 shown at the bottom for point 1 (left) and point 2 (right), indicating that clay formation  
 992 started inside small cracks of the calcite grain, although chemically still dominated by  
 993 Ca (point 1). In contrast, the soil matrix in the larger fissure is characterized by a  
 994 further increase of Si, Al, and Fe, while Ca was diminished (point 2).



995

996

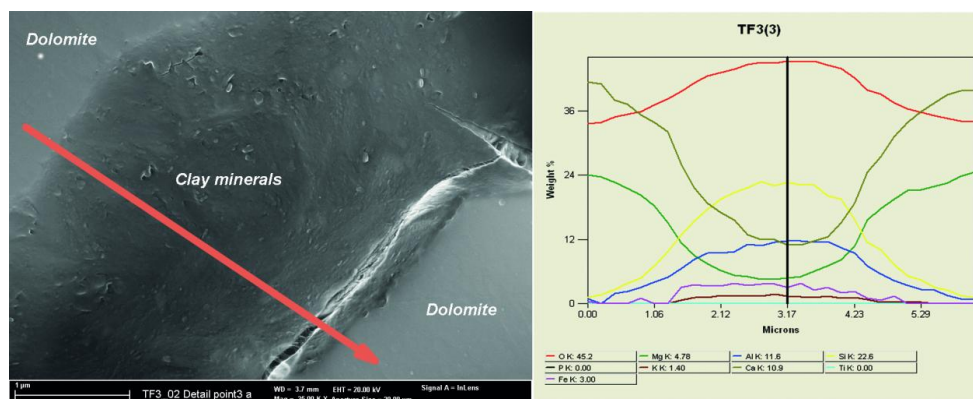

997

998 Figure 8: SEM cross-section using EDS to determine element composition along a  
 999 section of a dolomite grain in the rock-soil transition zone of the Terra fusca in the  
 1000 profile "Schwaighauser Forst". The graph to the right shows the weight % of the  
 1001 studied elements along the section marked by the arrow to the left. As can be seen,  
 1002 there is a gradual increase of Si, Al, and Fe towards the darker area of the dolomite  
 1003 grain, while Ca and Mg are reduced, pointing to gradual isovolumetric replacement of  
 1004 the dolomite by clay minerals.

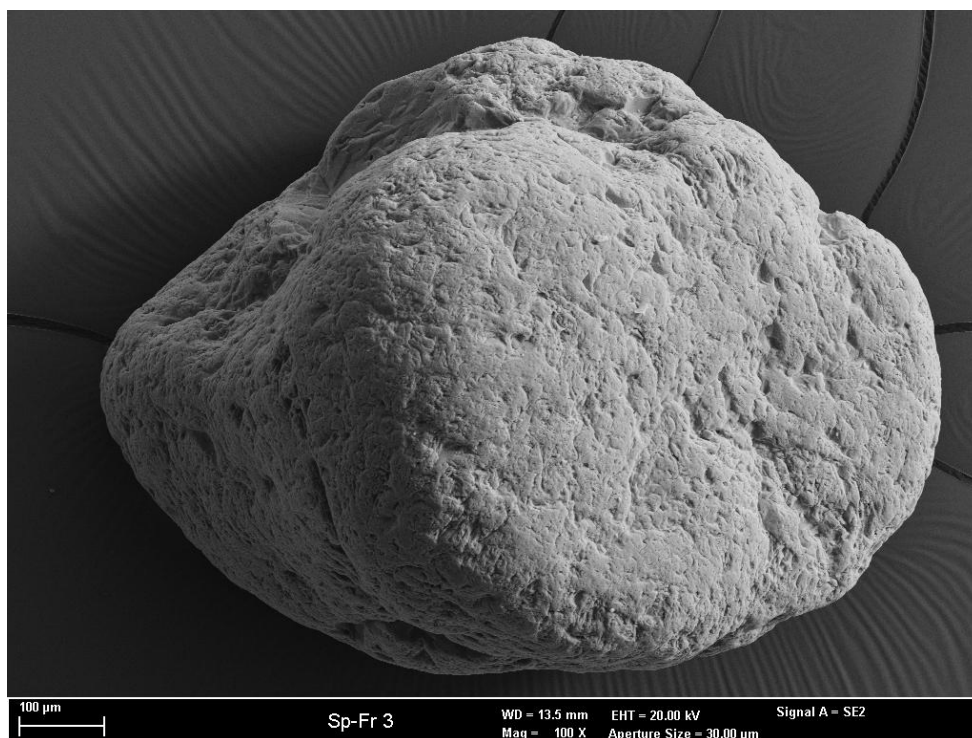

1005

1006 Figure 9: Quartz grain of the coarse sand fraction of the red fill in the limestone crack  
 1007 of the Fricke profile. Note the densely set small V-shaped marks typical for aeolian  
 1008 transport during loess deposition.

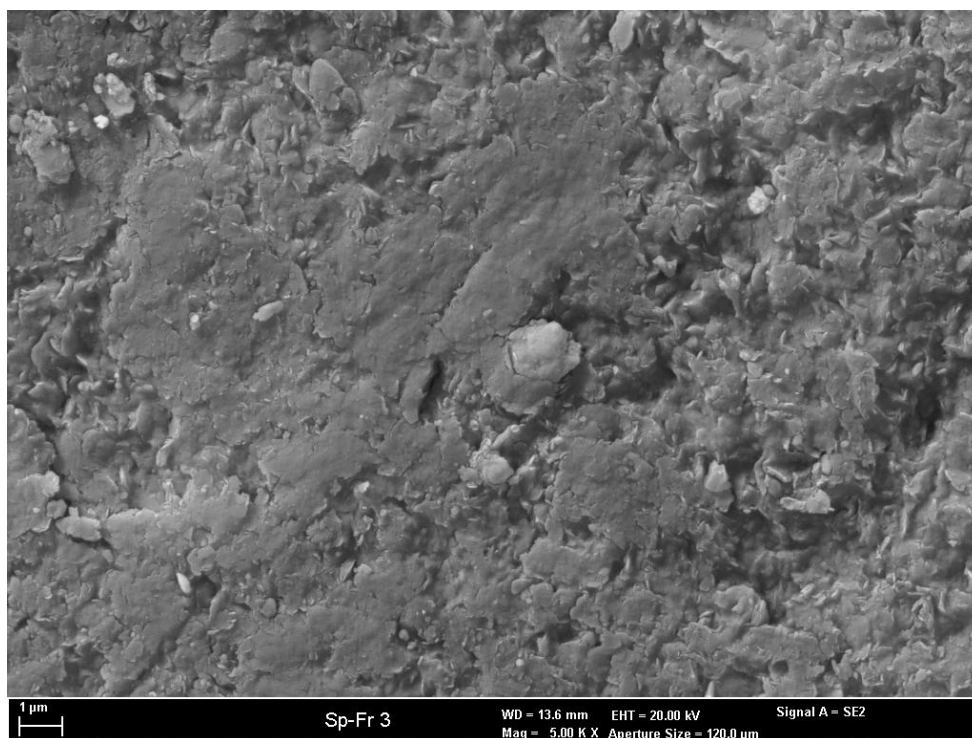

1009

1010 Figure 10: Grain from the fine sand fraction of the red fill in the limestone crack of the  
 1011 Fricke profile. It is completely covered by clay, possibly representing a pseudosand  
 1012 aggregate largely consisting of clay (and silt).

1013

1014

1015 Table 1: Results of bulk soil analyses of the profiles "Fricke" and "Schwaighauser  
 1016 Forst". The Fe (d/t) ratio describes the ratio of dithionite-soluble iron ( $Fe_d$ ) to total iron  
 1017 contents. Increasing redness is reflected by smaller values in the index according to  
 1018 Hurst (1977). The dolomite content of the bedrock at the Schwaighauser Forst profile  
 1019 was calculated according to the residue mass after the rock's dissolution with HCl.





| Sampling depth [cm]                | Sample     | Munsell dry | RR after Hurst (dry) | Oxalat-soluble silicon [mg/g] | Dithionit-soluble iron [mg/g] | C <sub>org</sub> % | pH  | CaCO <sub>3</sub> % | Clay % | Silt % | Sand % | Fe(d/t) | Ti/Zr |
|------------------------------------|------------|-------------|----------------------|-------------------------------|-------------------------------|--------------------|-----|---------------------|--------|--------|--------|---------|-------|
| <b>Profile FRICKE</b>              |            |             |                      |                               |                               |                    |     |                     |        |        |        |         |       |
| 0-25                               | Ah         | 10 YR 6/3   | 40                   | 0.01                          | 11.5                          | 3.08               | 4.5 | 2.1                 | 27     | 69     | 4      | 0.49    | 9     |
| 25-90                              | Bv         | 10 YR 6/4   | 30                   | 0.14                          | 17.5                          | 0.28               | 4.7 | 1.5                 | 36     | 61     | 3      | 0.47    | 11    |
| 90-125                             | II TBv     | 10 YR 6/4   | 30                   | 0.03                          | 19.1                          | 0.32               | 5.5 | 0.5                 | 45     | 52     | 3      | 0.43    | 12    |
| 125-200                            | II TCv     | 10 YR 6/4   | 30                   | 0.07                          | 26.6                          | 0.35               | 6.7 | 0.6                 | 59     | 38     | 3      | 0.54    | 15    |
| 370                                | III Tu (1) | 5 YR 4/4    | 15                   | 0.77                          | 33.6                          | 0.13               | 7.7 | 2.1                 | 65     | 22     | 13     | 0.5     | 18    |
| 520                                | III Tu (2) | 5 YR 4/4    | 15                   | 0.75                          | 33.0                          | 0.12               | 7.6 | 1.6                 | 66     | 21     | 13     | 0.49    | 15    |
| 500                                | mcC        | 10 YR 5/3   | 33                   | -                             | -                             | -                  | -   | 98.1                | 75     | 24     | 1      | -       | 20    |
| <b>Profile SCHWAIGHAUSER FORST</b> |            |             |                      |                               |                               |                    |     |                     |        |        |        |         |       |
| 0-5                                | Ah         | 10 YR 6/3   | 40                   | 0.02                          | 10.1                          | 3.80               | 6.5 | 4.6                 | 39     | 39     | 22     | 0.38    | 11    |
| 5-35                               | Tv         | 10 YR 6/4   | 30                   | 0.04                          | 14.3                          | 1.10               | 7.6 | 3.2                 | 57     | 28     | 15     | 0.43    | 13    |
| >35                                | TCv        | 10 YR 7/4   | 35                   | 0.06                          | 9.9                           | 1.40               | 7.6 | 35.2                | 67     | 23     | 10     | 0.49    | 21    |
| >50                                | mcC        | 10 YR 4/2   | 40                   | -                             | -                             | -                  | -   | (99.99)             | 86     | 13     | 1      | -       | 11    |

Table 1: Results of bulk soil analyses of the profiles "Fricke" and "Schwaighauser Forst". The Fe(d/t) ratio describes the ratio of dithionite-soluble iron (Fe<sub>d</sub>) to total iron contents. Increasing redness is reflected by smaller values in the index according to Hurst (1977). The dolomite content of the bedrock at the Schwaighauser Forst profile was calculated according to the residue mass after the rock's dissolution with HCl.
